# Supplementary material for: Fabrication of a novel hydrogel-based microfluidic chip and its application in pathogen analysis
Source: Royal Society of Chemistry journal article supplement (doi:10.1039/d1ay01522b), 2021-01-01
Supplement: d1ay01522b1.pdf [file d1ay01522b1.pdf]

## **Fabrication of a novel hydrogel-based microfluidic chip and its application in pathogen analysis**

Peng Zhao<sup>a</sup>, Jiajin Zhang<sup>b</sup>, Wei Zhang<sup>a</sup>, Dong Zhao<sup>c</sup>, Yi Ma<sup>d</sup>, Changjun Hou<sup>a</sup>,  
Laichun Lu<sup>a\*</sup>, Danqun Huo<sup>a\*</sup>

<sup>a</sup> Key Laboratory for Biorheological Science and Technology of Ministry of Education, State and Local Joint Engineering Laboratory for Vascular Implants, Bioengineering College of Chongqing University, Chongqing 400044, PR China

<sup>b</sup> Emory college of Art and Sciences, Emory University, Atlanta, GA 30322, America

<sup>c</sup>Strong-flavor Baijiu Solid state Fermentation Key Laboratory of China light industry, Wuliangye Group Co., Ltd, Yibin, 644000, PR China

<sup>d</sup> Liquor Making Biology Technology and Application of Key Laboratory of Sichuan Province, College of Bioengineering, Sichuan University of Science and Engineering, Zigong, 643000, PR China

\* Corresponding author. Tel.: +86 23 6511 2673; fax: +86 23 6510 2507.

E-mail addresses: Lulaicq@163.com (L. Lu)

huodq@cqu.edu.cn (D. Huo)

**Table S1.** Sample design for contact angle measurement.

| Sample | Components (w/w)        |
|--------|-------------------------|
| 1      | DMAEMA                  |
| 2      | PEGDA                   |
| 3      | PEGDA/DMAEMA=5:5+5%NVP  |
| 4      | PEGDA/DMAEMA=6:4+5%NVP  |
| 5      | PEGDA/DMAEMA=7:3+5%NVP  |
| 6      | PEGDA/DMAEMA=5:5+10%NVP |
| 7      | PEGDA/DMAEMA=6:4+10%NVP |
| 8      | PEGDA/DMAEMA=7:3+10%NVP |

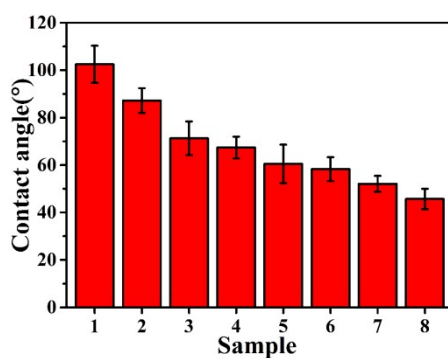

**Fig. S1** The result of contact angle measurement.

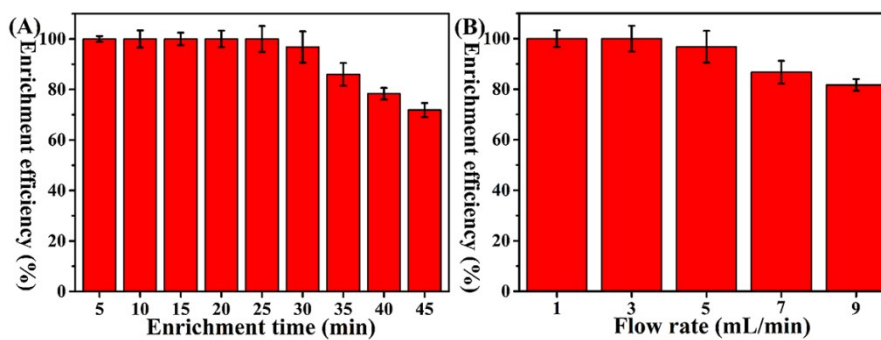

**Fig. S2** The effect of enrichment time and flow rate on enrichment efficiency.

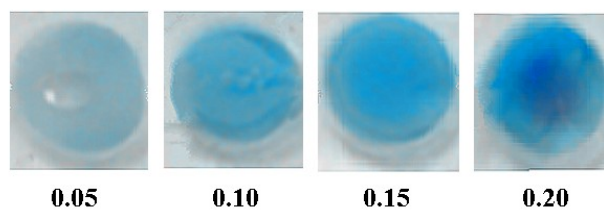

**Fig. S3** Coloring effect of different concentrations of chromogenic media (g/mL).

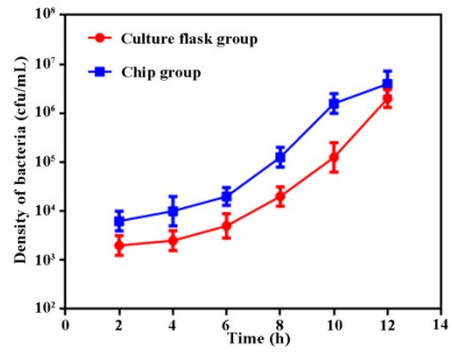

**Fig. S4** Comparison of growth of *E.coli* cultured on microfluidic chip and in flasks.
